# Supplementary material for: Dye-sensitized solar cells composed of photoactive composite photoelectrodes with enhanced solar energy conversion efficiency
Source: Royal Society of Chemistry journal article supplement (doi:10.1039/c5ta02363g), 2015-01-01
Supplement: c5ta02363g1.pdf [file c5ta02363g1.pdf]

## Supporting Information

### Dye-sensitized solar cells composed of photoactive composite photoelectrodes with enhanced solar energy conversion efficiency

Hong Ha Thi Vu<sup>1</sup>, Timur Sh. Atabaev<sup>1\*</sup>, Ji Young Ah<sup>2</sup>, Nguyen Nang Dinh<sup>3</sup>, Hyung-Kook

Kim<sup>1\*</sup>, Yoon-Hwae Hwang<sup>1\*</sup>

<sup>1</sup> Department of Nano Energy Engineering, Pusan National University, Miryang 627-706, South Korea

<sup>2</sup> Research Center for Dielectric and Advanced Matter Physics, Pusan National University, Miryang 627-706, South Korea

<sup>3</sup> Department of Semiconducting Nanomaterials and Devices, University of Engineering and Technology, Hanoi National University, Hanoi, Vietnam

Email: [atabaev@snu.ac.kr](mailto:atabaev@snu.ac.kr) (T.S. Atabaev), [hkkim@pusan.ac.kr](mailto:hkkim@pusan.ac.kr) (H.K. Kim) and [yhwang@pusan.ac.kr](mailto:yhwang@pusan.ac.kr) (Y.H. Hwang)

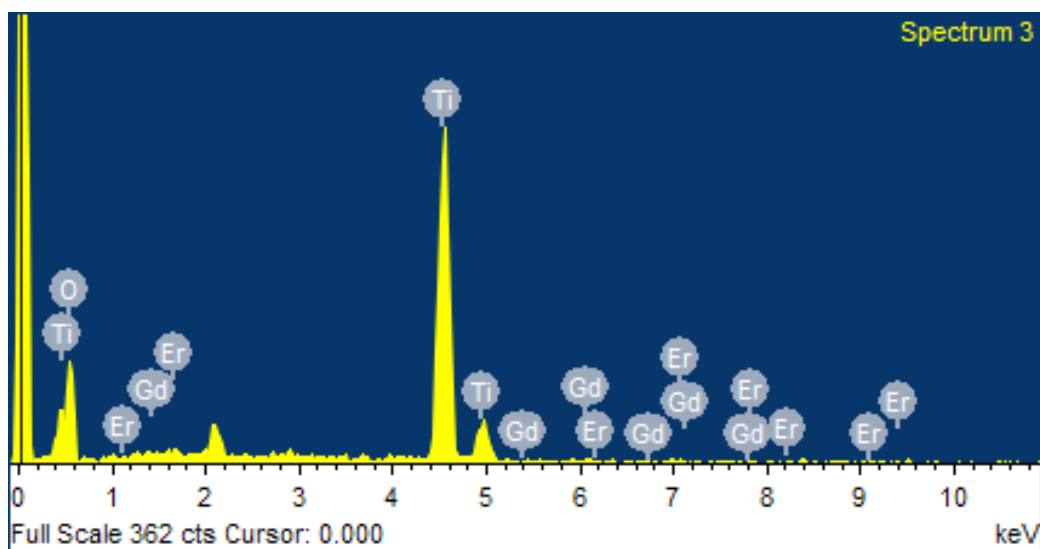

Figure S1. EDX analysis of the TiO<sub>2</sub>/mix surface

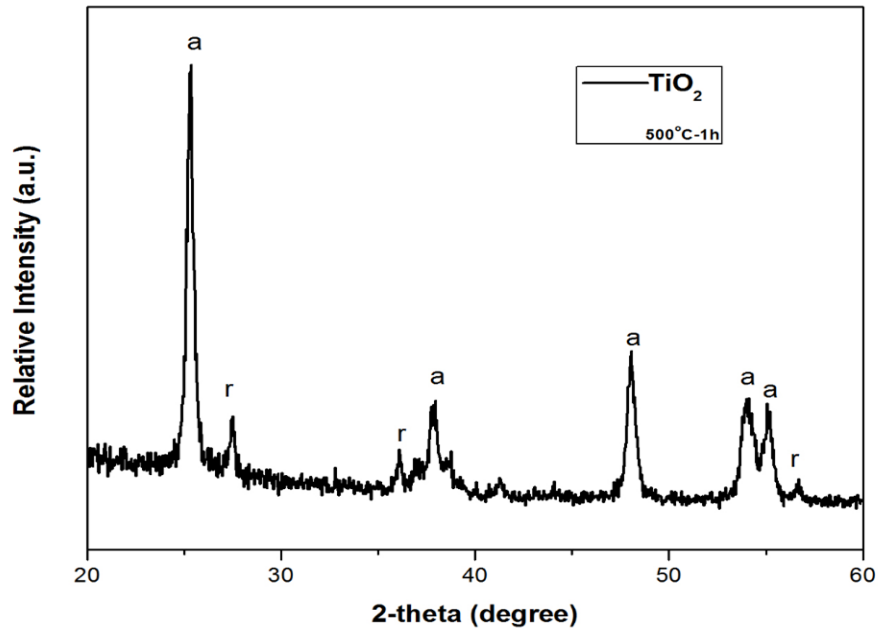

Figure S2. The XRD pattern of  $\text{TiO}_2$  calcinated at  $500^\circ\text{C}$ .

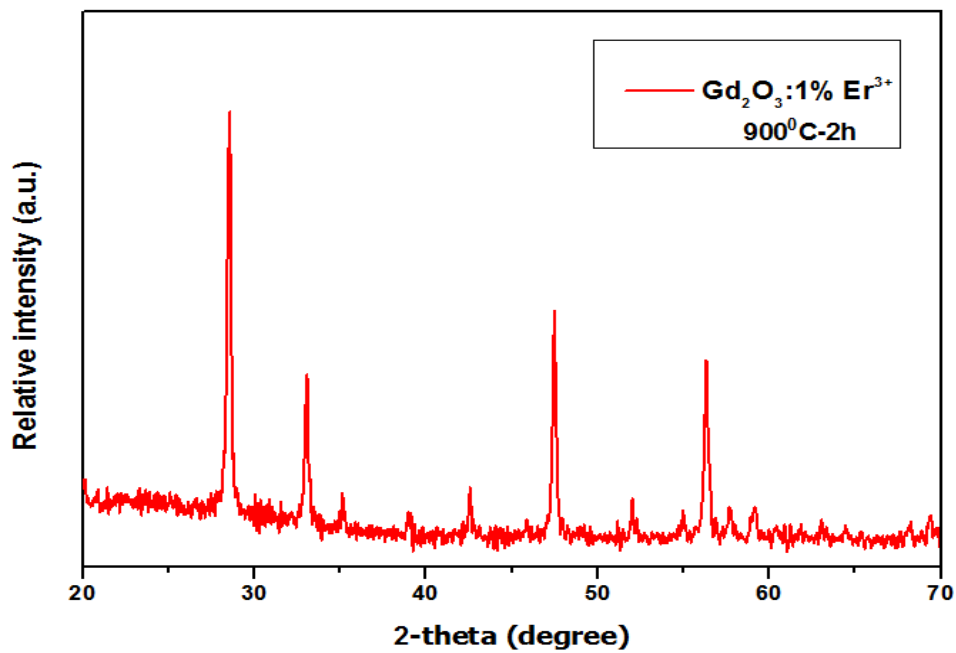

Figure S3. The XRD pattern of  $\text{Gd}_2\text{O}_3:1\% \text{Er}^{3+}$  calcinated at  $900^\circ\text{C}$ .

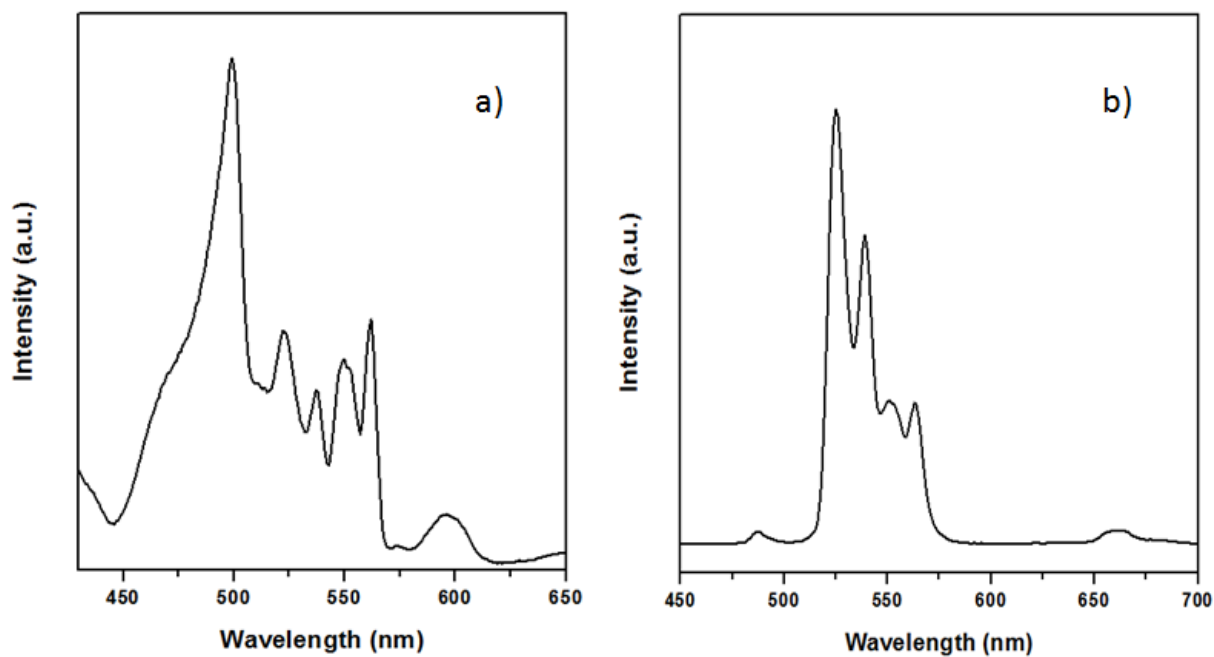

**Figure S4.** DC (a) and UC (b) luminescence spectra of  $\text{Gd}_2\text{O}_3$ : 1%  $\text{Er}^{3+}$  nanoparticles excited with 380 nm and 975nm NIR laser, respectively.

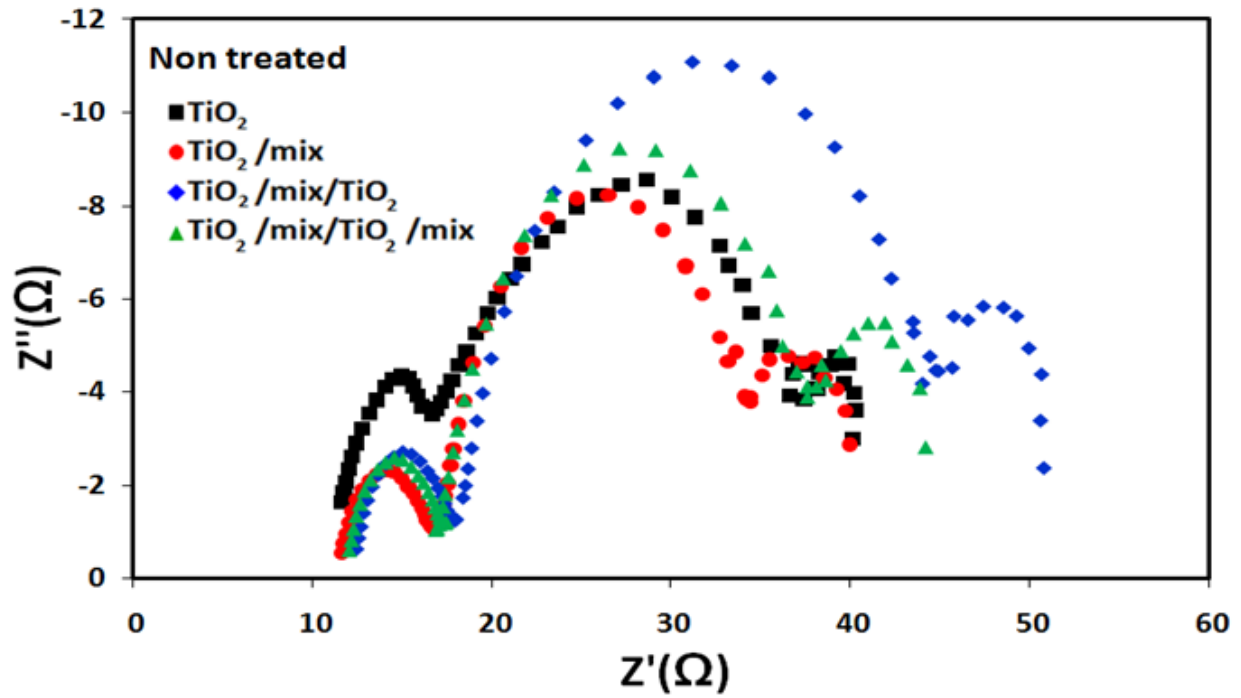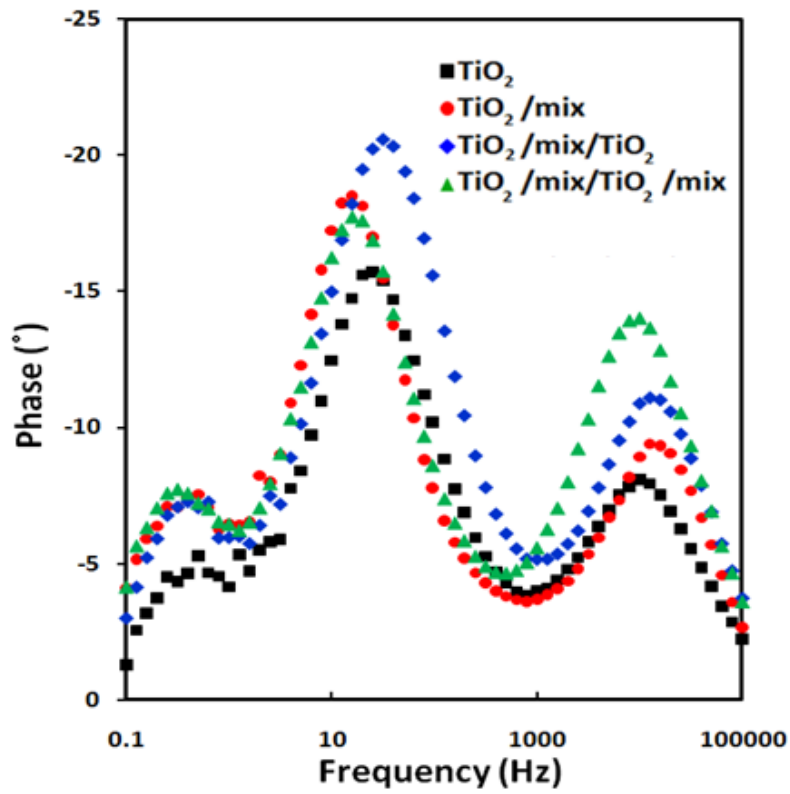

**Figure S5.** Nyquist plots and Bode phase plots of DSSC comprised of different electrode (Non-treated with  $\text{TiCl}_4$ )

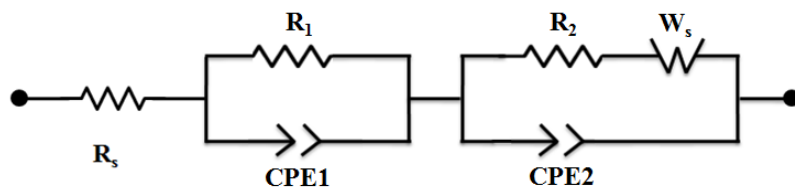

**Figure S6.** Corresponding equivalent circuit model of EIS spectra

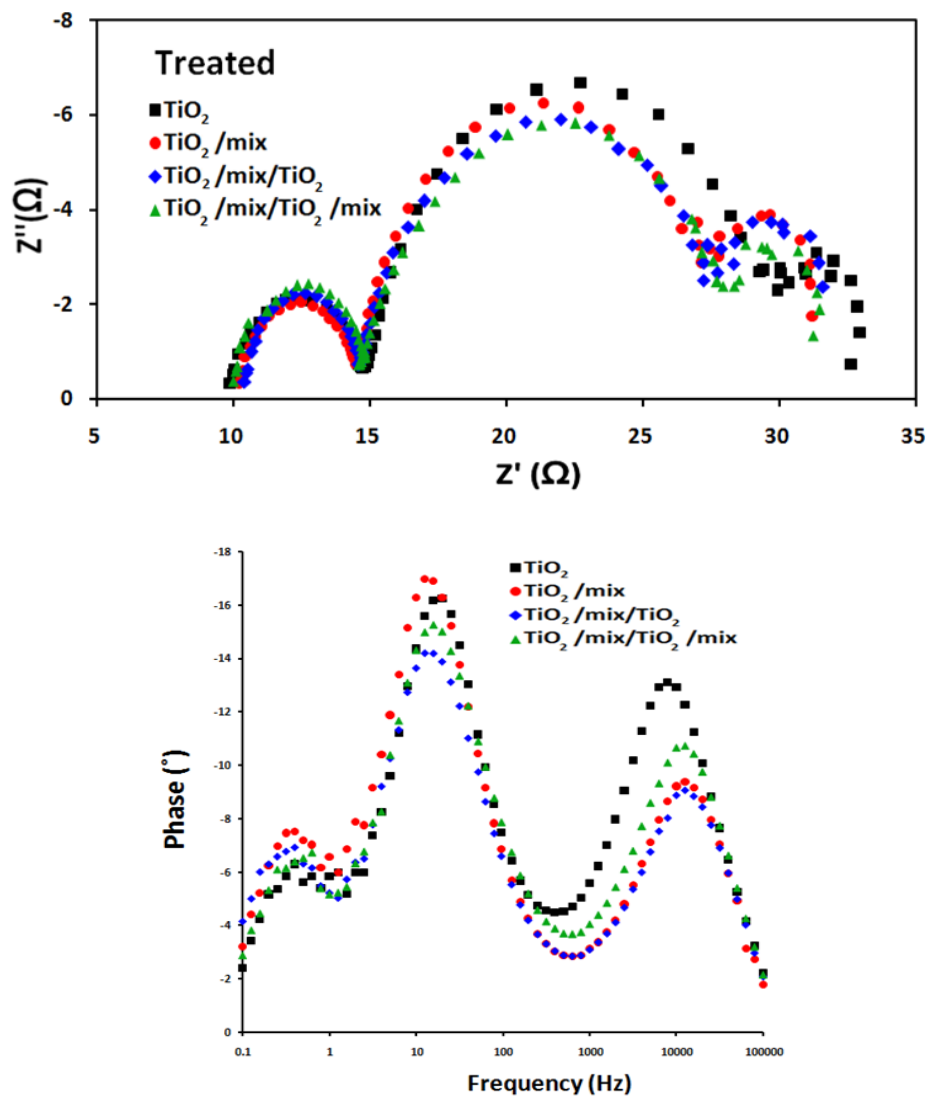

**Figure S7.** Nyquist plots and Bode phase plots of DSSC comprised of different electrode (Treated with  $TiCl_4$ )

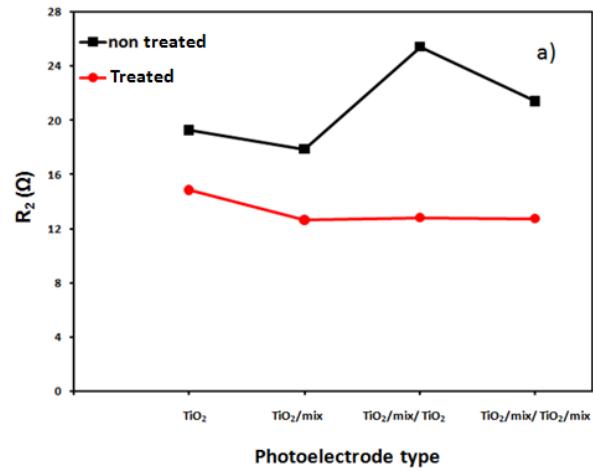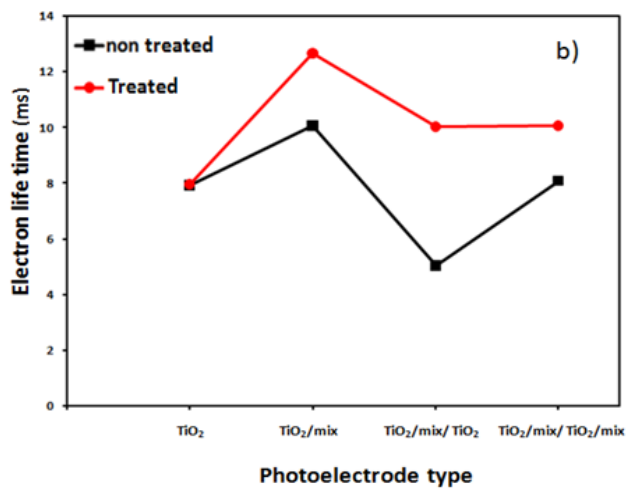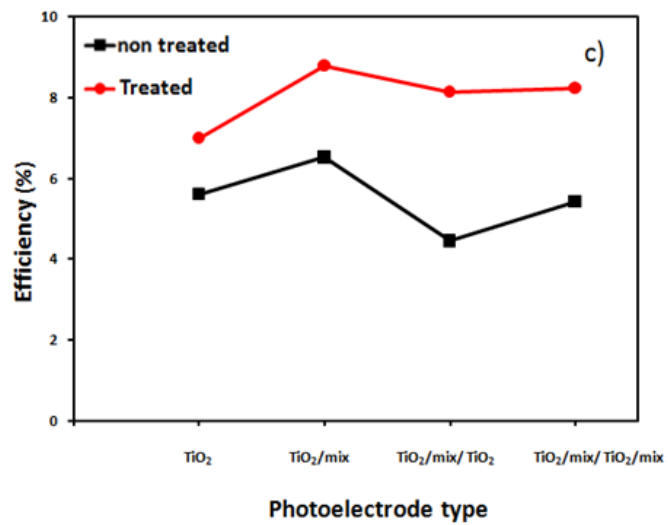

**Figure S8.** Dependence of  $R_2$ (a), electron life time, efficiency(c) on the different non-treated (black) and treated (red) PEs for DSSC.
